# Supplementary material
Source: publisher site journal article supplement (https://www.kjim.org/upload/media/kjim-2025-130-Supplementary-Table-3.pdf)
Supplement: Supplementary file 1 [file kjim-2025-130-Supplementary-Table-3.pdf]

**Supplementary Table 3. Detailed clinical histories of steroid burst use**

|            | Time-point of steroid use | Daily dose <sup>a)</sup> (mg/day) | Duration (d) | Reason for steroid bursts                                              |
|------------|---------------------------|-----------------------------------|--------------|------------------------------------------------------------------------|
| Subject #1 | V4 (2022.9.2–9.6)         | 20                                | 5            | Asthma exacerbation (COVID-19)                                         |
|            | V14 (2023.7.28–8.3)       | 20                                | 7            | Asthma exacerbation (upper respiratory infection)                      |
|            | V14 (2023.9.4–9.6; 9.22)  | 10                                | 4            | New onset wheezing and dyspnea, aggravating sinusitis and ear fullness |
|            | V16 (2024.3.15–3.19)      | 20                                | 5            | Asthma exacerbation (upper respiratory infection)                      |
|            | V16 (2024.4.9–4.13)       | 20                                | 5            | Asthma exacerbation (upper respiratory infection)                      |
| Subject #3 | V14 (2024.1.19–1.30)      | 20                                | 7            | Asthma exacerbation (upper respiratory infection)                      |
|            |                           | 10                                | 5            |                                                                        |
|            | V16 (2024.7.2–7.8)        | 20                                | 7            | Asthma exacerbation (upper respiratory infection)                      |

V, visit; COVID-19, coronavirus disease 2019.

<sup>a)</sup>Equivalent dose of prednisolone, calculated by dividing the total amount of systemic steroids used by the follow-up duration.
